# Supplementary material for: A reactive matrix for in situ chemical derivatisation and specific detection of cis-diol compounds by matrix-assisted laser desorption/ionisation mass spectrometry
Source: Royal Society of Chemistry journal article supplement (doi:10.1039/d3an01400b), 2023-01-01
Supplement: d3an01400b1.pdf [file d3an01400b1.pdf]

1                                    **Supporting information for**  
2        **A reactive matrix for in-situ chemical derivatization and specific**  
3                    **detection of cis-diol compounds by matrix-assisted laser**  
4                                    **desorption/ionization mass spectrometry**

5    Jiajing Chen,<sup>a</sup> Huan Huang,<sup>a</sup> Dan Ouyang,<sup>a</sup> Jiali Lin,<sup>a</sup> Zhuling Chen,<sup>a</sup> Zongwei Cai,<sup>b</sup>  
6    and Zian Lin<sup>\*a</sup>

7  
8    <sup>a</sup> Ministry of Education Key Laboratory of Analytical Science for Food Safety and  
9    Biology, Fujian Provincial Key Laboratory of Analysis and Detection Technology for  
10   Food Safety, College of Chemistry, Fuzhou University, Fuzhou, Fujian, 350108,  
11   China.

12   <sup>b</sup> State Key Laboratory of Environmental and Biological Analysis, Department of  
13   Chemistry, Hong Kong Baptist University, 224 Waterloo Road, Kowloon Tong, Hong  
14   Kong, SAR, P. R. China.

15

16   ● **Corresponding author:** Zian Lin;

17   ● **Postal address:** 2 Xueyuan Road, Qishan Campus, College of  
18   Chemistry, Fuzhou University, Fuzhou, Fujian 350108, China

19   ● **Fax:** 86-591-22866135

20   **E-mail:** zianlin@fzu.edu.cn (Z. Lin);

21

22

## 23 **1. Materials and Reagents**

24 6-Quinolineboronic acid pinacol ester was purchased from Suzhou Sukailu Chemical  
25 Technology Co., Ltd. (Jiangsu, China). Methyl iodide was purchased from Zesheng  
26 Technology Co., Ltd. (Anhui, China). Methanol (MeOH), acetonitrile (ACN), diethyl  
27 ether, hydrochloric acid, and glycerol were obtained from Sinopharm Chemical  
28 Reagent Co., Ltd. (Shanghai, China). Trifluoroacetic acid (TFA), 2,5-  
29 dihydroxybenzoic acid (DHB), ethylene glycol, caffeic acid, dopamine hydrochloride,  
30 epinephrine hydrochloride, DL-norepinephrine hydrochloride, DL-xylose, baicalein,  
31 and luteolin were purchased from Aladdin Biochemical Technology Co., Ltd.  
32 (Shanghai, China). 1,3-Propanediol was purchased from Bide Medical Technology  
33 Co., Ltd. (Shanghai, China). Catechol, and glucose were bought from Fuchen  
34 Chemical Reagent Co., Ltd. (Tianjin, China). Benzocatechol, and adenosine were  
35 purchased from Macklin Biochemical Co., Ltd. (Shanghai, China). Xylitol, and  
36 sorbitol were purchased from Xianding Biotechnology Co., Ltd. (Shanghai, China).  
37 DL-Dithiothreitol was purchased from Sigma-Aldrich (St. Louis, MO, USA).  
38 Catechin was purchased from Chengdu Push Bio-technology Co., Ltd. (Sichuan,  
39 China). Sugar-free foods were sourced from local supermarkets.

## 40 **2. Sample Preparation**

41 Ethylene glycol, 1,3-propanediol, glycerol, catechol, 1,2-dihydroxynaphthalene,  
42 caffeic acid, baicalein, luteolin, and catechin (10 mM) were dissolved in methanol,  
43 while dopamine hydrochloride, epinephrine hydrochloride, noradrenaline  
44 hydrochloride, xylose, glucose, adenosine, xylitol, dithiothreitol, and sorbitol (10 mM)

45 were prepared in water as stock solutions. All analyte solutions were stored at 4 °C  
46 prior to use. For MALDI-MS analysis, 1 µL of sample solution was mixed with 1 µL  
47 of matrix solution and incubated at room temperature for 10 min. Then, 1 µL of the  
48 mixed solution was deposited on the MALDI plate and followed by air drying before  
49 analysis.

### 50 **3. Matrix Characterization**

51 The NMR spectra of BMQI were acquired on JNM- ECZ500R/S1 spectrometer.  
52 Chemical shifts ( $\delta$ ) were expressed in ppm. DMSO-*d*<sub>6</sub> (2.5 ppm for <sup>1</sup>H, 40 for <sup>13</sup>C)  
53 with 1 drop of D<sub>2</sub>O were used to calibrate the chemical shifts. The specific chemical  
54 shifts were as follows:

55 BMQI, <sup>1</sup>H NMR (DMSO-*d*<sub>6</sub> with 1 drop of D<sub>2</sub>O, 500 MHz):  $\delta$  9.50 (d, 1H, J =  
56 5.6 Hz), 9.26 (d, 1H, J = 8.3 Hz), 8.78 (s, 1H), 8.54 (d, 1H, J = 10.0 Hz), 8.44 (d, 1H,  
57 J = 8.9 Hz), 8.11 (dd, 1H, J = 8.3, 5.8 Hz), 4.62 (s, 3H) ppm. <sup>13</sup>C NMR (DMSO-*d*<sub>6</sub>  
58 with 1 drop of D<sub>2</sub>O, 126 MHz):  $\delta$  150.59, 147.78, 140.16, 139.45, 137.01, 128.80,  
59 122.06, 118.04, 45.44 ppm.

60 The FT-IR spectroscopy investigation was performed using a Nicolet 6700 FT-  
61 IR spectrometer (Thermo, USA). The UV-Vis absorption spectra were measured  
62 using a UV-9000S spectrophotometer (Metash, Shanghai).

### 63 **4. Optimization of Experimental Conditions**

64 Taking 2 µmol/mL catechol as a template, three parallel experiments were carried out,  
65 and six mass spectra for each sample point were obtained. To explore the influence of  
66 the main solvent on derivatization reaction, BMQI (2 mg/mL) was prepared in H<sub>2</sub>O,

67 MeOH/H<sub>2</sub>O (1/1, v/v), EtOH/H<sub>2</sub>O (1/1, v/v), ACN/H<sub>2</sub>O (1/1, v/v), and THF/H<sub>2</sub>O (1/1,  
68 v/v) solutions, respectively. Catechol (2 μmol/mL) was dissolved in H<sub>2</sub>O, MeOH,  
69 EtOH, ACN, and THF, respectively. And then, 1 μL of matrix solutions was mixed  
70 with the 1 μL of analyte solutions of the same solvent followed by deposition on a  
71 target plate for MALDI-MS detection. The solvents ratio after mixing the samples  
72 were 100% H<sub>2</sub>O, 75% MeOH-H<sub>2</sub>O, 75% EtOH-H<sub>2</sub>O, 75% THF-H<sub>2</sub>O, and 75% ACN-  
73 H<sub>2</sub>O.

74

75

76

77

78

79

80

81

82

83

84

85

86

87

88

## 89 Figures

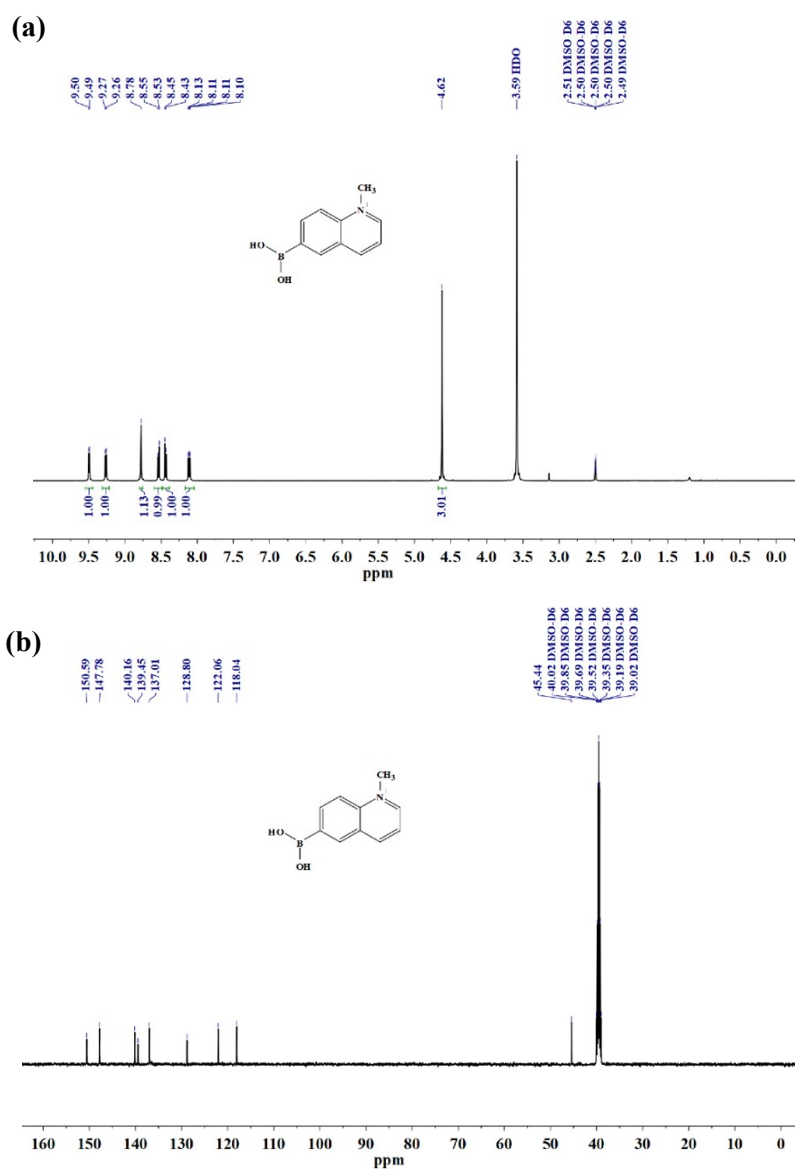

**Fig. S1.** (a)  $^1\text{H}$  and (b)  $^{13}\text{C}$  NMR spectra of BMQI.

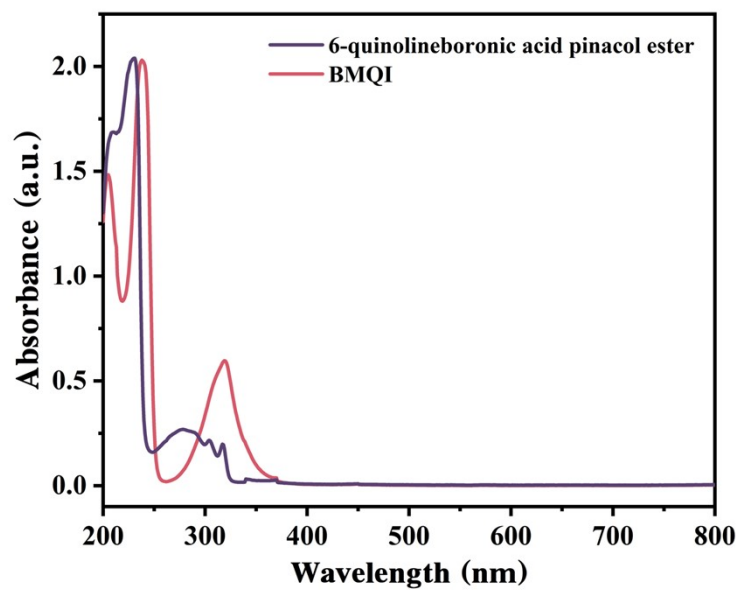

94

95 **Fig. S2.** UV-vis absorption spectra of 6-quinolineboronic acid pinacol ester and

96 BMQI in solution.

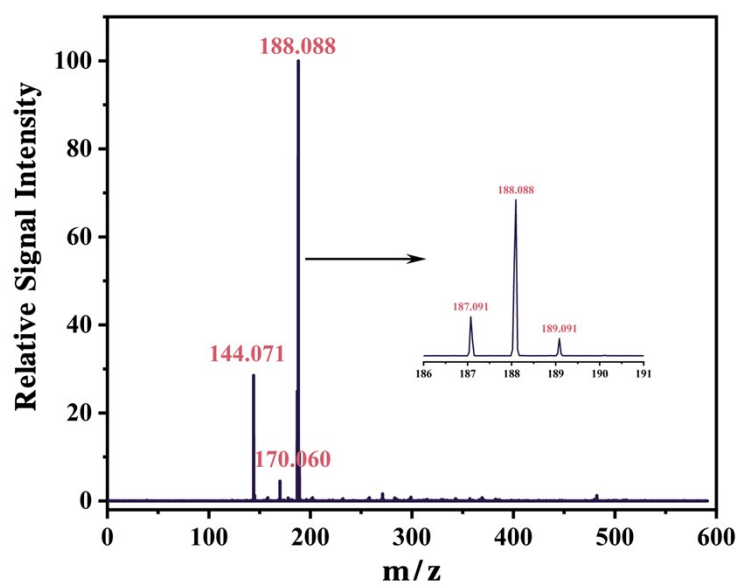

97

98 **Fig. S3.** MALDI-MS spectrum of BMQI (inset: isotope pattern of the boron atom).

99

100

101

102

103

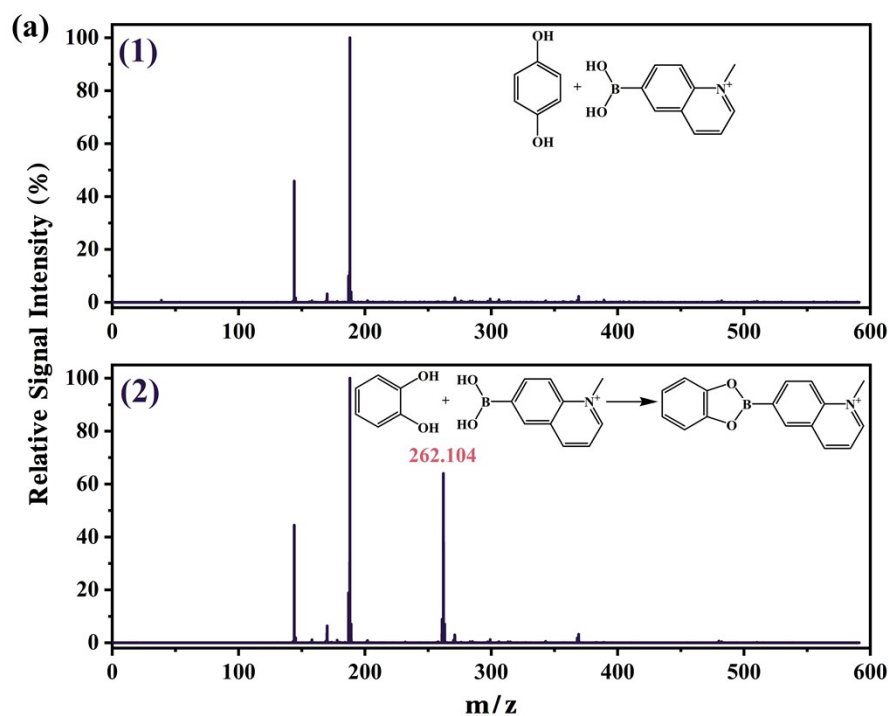

104

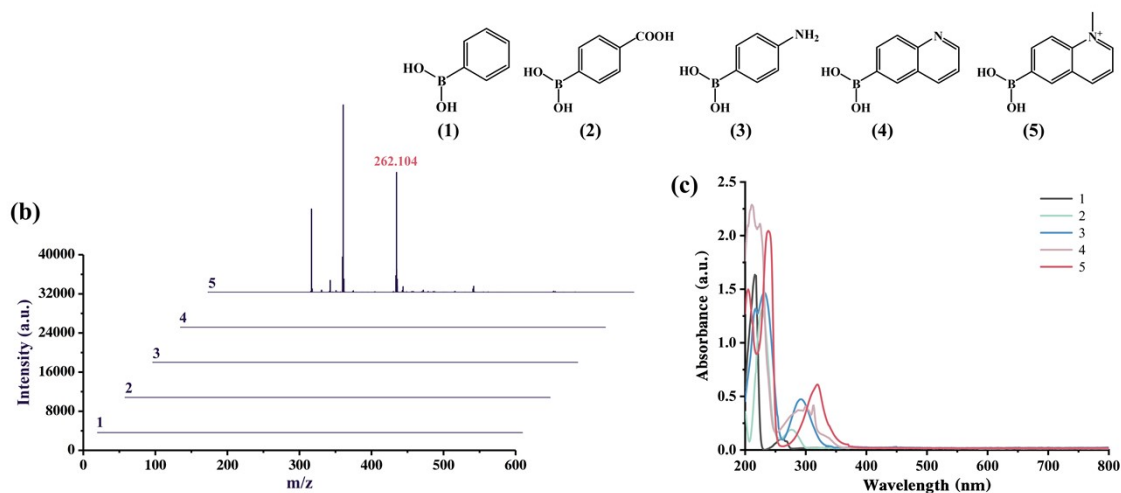

105

106 **Fig. S4.** (a) MALDI-MS spectra of (1) hydroquinone and (2) catechol using BMQI as  
 107 reactive matrix, the amounts of hydroquinone and catechol were 1 nmol. (b) MALDI-  
 108 MS spectra of catechol using boronic acid organic compounds as the matrices, (c)  
 109 UV-Vis absorption spectra of boronic acid organic compounds, including (1)  
 110 phenylboronic acid, (2) p-carboxyphenylboronic acid, (3) p-aminophenylboronic acid,  
 111 (4) quinoline-6-boronic acid, and (5) BMQI, the concentrations of all boronic acid

112 compounds were 6 mg/mL.

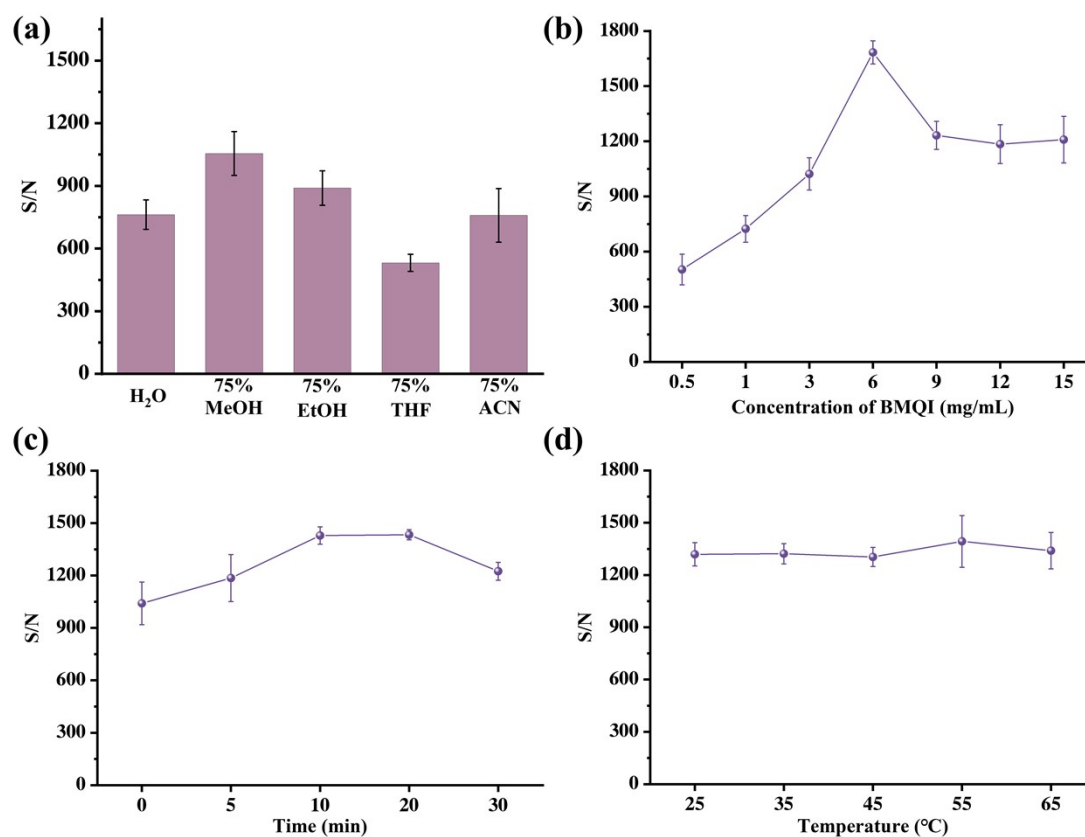

113

114 **Fig. S5.** The S/N ratio of 2  $\mu\text{mol/mL}$  catechol by varying the reaction conditions,  
115 including (a) solvent type (the solvents ratio after mixing the samples were: 100%  
116 H<sub>2</sub>O, 75% MeOH-H<sub>2</sub>O, 75% EtOH-H<sub>2</sub>O, 75% THF-H<sub>2</sub>O, and 75% ACN-H<sub>2</sub>O), (b)  
117 concentration of BMQI, (c) reaction time, and (d) drying temperature.



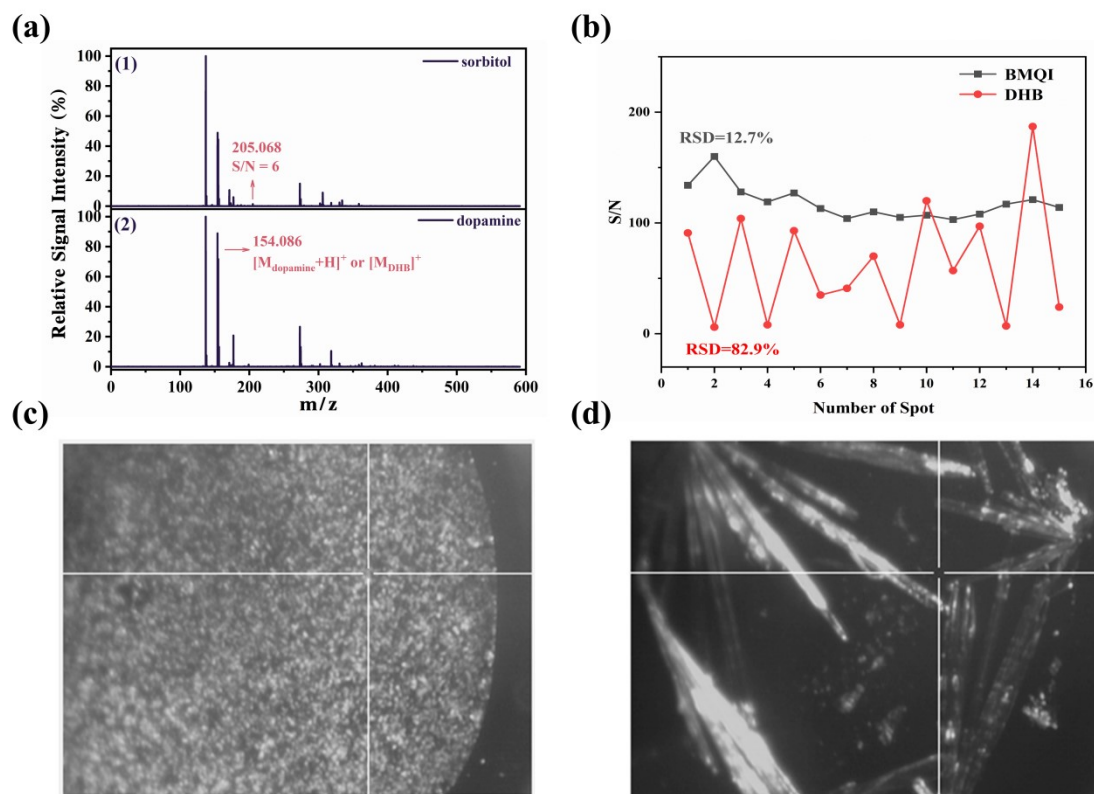

118

119 **Fig. S6.** (a) MALDI-MS spectra of (1) sorbitol and (2) dopamine using DHB as  
 120 matrix. (b) The S/N ratio of sorbitol repeatedly acquired from 15 different sample  
 121 spots using DHB (red line) as matrix and BMQI (gray line) as reactive matrix in  
 122 positive ion mode, the amounts of sorbitol and dopamine were 1 nmol. Photographs  
 123 of the sample spots using (c) BMQI as a reactive matrix and (d) DHB as the matrix.

124

125

126
